# Supplementary material for: Quantification of allochthonous and autochthonous organic carbon in large and shallow Lake Wuliangsu based on distribution patterns and δ 13 C signatures of n-alkanes
Source: Copernicus journal article supplement (doi:10.5194/bg-2023-134), 2023-08-17
Supplement: Supplementary file 1 [file bg-2023-134-supplement.pdf]

## Supplementary Material for

### Quantification of allochthonous and autochthonous organic carbon in large and shallow Lake Wuliangsu based on distribution patterns and $\delta^{13}\text{C}$ signatures of *n*-alkanes

Qingfeng Zhao<sup>1</sup>, Aifeng Zhou<sup>2</sup>, Yuxin He<sup>1\*</sup>

<sup>1</sup> Organic Geochemistry Unit, Key Laboratory of Geoscience Big Data and Deep Resource of Zhejiang Province, School of Earth Sciences, Zhejiang University, Hangzhou, 310058, China

<sup>2</sup> Key Laboratory of Western China's Environmental Systems (Ministry of Education), College of Earth and Environmental Sciences, Lanzhou University, Lanzhou, 730000, China

#### Contents of this file:

1. Supplementary equations for end-members mixing models
2. Supplementary figures: Figure S1
3. Supplementary tables: Table S1 to S4

#### 1. Supplementary equations for end-members mixing models

##### 1.1 Proxies:

$$P_{aq} = (C_{23} + C_{25}) / (C_{23} + C_{25} + C_{29} + C_{31}) \text{ (Ficken et al. 2000) (1)}$$

$$\text{CPI} = 0.5 \times ((C_{23} + C_{25} + C_{27} + C_{29}) + (C_{25} + C_{27} + C_{29} + C_{31})) / (C_{24} + C_{26} + C_{28} + C_{30})$$

(Eglinton and Hamilton, 1967) (2)

where  $C_i$  are the concentration of *n*- $C_i$  alkane in samples.

##### 1.2 Equations for Model #1

$$F_{\text{sub}} \times \%C_{23+25\text{-sub}} + F_{\text{emer}} \times \%C_{23+25\text{-emer}} + F_{\text{riv}} \times \%C_{23+25\text{-riv}} = \%C_{23+25\text{-sample}} \text{ (3);}$$

$$F_{\text{sub}} \times \%C_{27+29\text{-sub}} + F_{\text{emer}} \times \%C_{27+29\text{-emer}} + F_{\text{riv}} \times \%C_{27+29\text{-riv}} = \%C_{27+29\text{-sample}} \text{ (4);}$$

$$F_{\text{sub}} \times \%C_{31\text{-sub}} + F_{\text{riv}} \times \%C_{31\text{-riv}} = \%C_{31\text{-sample}} \text{ (5);}$$

$$F_{\text{sub}} + F_{\text{emer}} + F_{\text{riv}} = 1 \text{ (6).}$$

where  $F_{\text{sub}}$ ,  $F_{\text{emer}}$ , and  $F_{\text{riv}}$  are relative contributions to sedimentary *n*- $C_{23+25+27+29+31}$  alkanes from submerged macrophytes, emergent plants, and riverine sources, respectively.  $\%C_{x\text{-sub}}$ ,  $\%C_{x\text{-emer}}$ ,  $\%C_{x\text{-riv}}$ , and  $\%C_{x\text{-sample}}$  denotes the relative proportions of *n*- $C_x$  alkanes to total *n*- $C_{23+25+27+29+31}$  alkanes from submerged macrophytes, emergent plants, riverine sediment, and samples, respectively.

### 1.3 Equations for $CPI_{est}$ and $\delta^{13}C_{i-est}$

$$CPI_{est} = \frac{(1 + \%C_{25+27+29-sub}) \times F_{sub} + (1 + \%C_{25+27+29-emer}) \times F_{emer} + (1 + \%C_{25+27+29-riv}) \times F_{riv}}{((1 + \%C_{25+27+29-sub}) \times F_{sub} / CPI_{sub} + (1 + \%C_{25+27+29-emer}) \times F_{emer} / CPI_{emer} + (1 + \%C_{25+27+29-riv}) \times F_{riv} / CPI_{riv})} \quad (7)$$

$$\delta^{13}C_{i-est} = \frac{(F_{sub} \times \%C_{i-sub} \times \delta^{13}C_{i-sub} + F_{emer} \times \%C_{i-emer} \times \delta^{13}C_{i-emer} + F_{riv} \times \%C_{i-riv} \times \delta^{13}C_{i-riv})}{(F_{sub} \times \%C_{i-sub} + F_{emer} \times \%C_{i-emer} + F_{riv} \times \%C_{i-riv})} \quad (8)$$

where  $F_{sub}$ ,  $F_{emer}$ , and  $F_{riv}$  are relative contributions to sedimentary  $n-C_{23+25+27+29+31}$  alkanes from submerged macrophytes, emergent plants, and riverine sources calculated by the end-member mixing model.  $\delta^{13}C_{i-sub}$ ,  $\delta^{13}C_{i-emer}$ , and  $\delta^{13}C_{i-riv}$  are the  $\delta^{13}C$  values of  $n-C_i$  alkane of submerged macrophytes, emergent plants, and riverine sediment, respectively.  $\%C_{x-sub}$ ,  $\%C_{x-emer}$ , and  $\%C_{x-riv}$  denotes the relative proportions of  $n-C_x$  alkanes to total  $n-C_{23+25+27+29+31}$  alkanes from submerged macrophytes, emergent plants, and riverine sediment, respectively.  $CPI_{sub}$ ,  $CPI_{emer}$ , and  $CPI_{riv}$  are the CPI values of submerged macrophytes, emergent plants, and riverine sediment, respectively.

### 1.4 Equations for Model #2

$$X_{i-riv+emer} = f_{emer} / (f_{emer} + f_{riv}) \times \%C_{i-emer} \times \delta^{13}C_{i-emer} + f_{riv} / (f_{emer} + f_{riv}) \times \%C_{i-riv} \times \delta^{13}C_{i-riv} \quad (9)$$

$$X_{i-riv+emer} + F_{i-sub} \times \delta^{13}C_{i-sub} = \delta^{13}C_{i-sample} \quad (10)$$

$$F_{sub} = \sum F_{i-sub} \times \%C_{i-sample} \quad (11)$$

$$X_{i-riv+sub} = f_{sub} / (f_{sub} + f_{riv}) \times \%C_{i-sub} \times \delta^{13}C_{i-sub} + f_{riv} / (f_{sub} + f_{riv}) \times \%C_{i-riv} \times \delta^{13}C_{i-riv} \quad (12)$$

$$X_{i-riv+sub} + F_{i-emer} \times \delta^{13}C_{i-emer} = \delta^{13}C_{i-sample} \quad (13)$$

$$F_{emer} = \sum F_{i-emer} \times \%C_{i-sample} \quad (14)$$

$$F_{riv} = 1 - F_{emer} - F_{sub} \quad (15)$$

Where  $\delta^{13}C_{i-sub}$ ,  $\delta^{13}C_{i-emer}$ ,  $\delta^{13}C_{i-riv}$ , and  $\delta^{13}C_{i-sample}$  are the  $\delta^{13}C$  values of  $n-C_i$  alkane of submerged macrophytes, emergent plants, riverine soil, and lake sediments, respectively.  $X_{i-riv+emer}$  is mixture  $\delta^{13}C$  signature of  $n-C_i$  alkane of riverine source and emergent plants.  $X_{i-riv+sub}$  is mixture  $\delta^{13}C$  signature of  $n-C_i$  alkane of riverine source and submerged macrophytes.

### 1.5 Equations for Model #3

$$F_{emer} = (1 - F_{sub}) \times f_{emer} / (f_{emer} + f_{riv}) \quad (16)$$

$$F_{riv} = 1 - F_{emer} - F_{sub} \quad (17)$$

## 1.6 Equations for absolute contributions to sedimentary OC

$$\text{TOC}_{\text{sub-sample}} = \text{TOC}_{\text{sample}} \times (\text{F}_{\text{sub-sample}} / n\text{-C}_{23+25+27+29+31\text{-sub}} \times \text{TOC}_{\text{sub}}) / ((\text{F}_{\text{sub-sample}} / n\text{-C}_{23+25+27+29+31\text{-sub}} \times \text{TOC}_{\text{sub}}) + (\text{F}_{\text{emer-sample}} / n\text{-C}_{23+25+27+29+31\text{-emer}} \times \text{TOC}_{\text{emer}}) + (\text{F}_{\text{riv-sample}} / n\text{-C}_{23+25+27+29+31\text{-riv}} \times \text{TOC}_{\text{riv}})) \quad (18)$$

$$\text{TOC}_{\text{emer-sample}} = \text{TOC}_{\text{sample}} \times (\text{F}_{\text{emer-sample}} / n\text{-C}_{23+25+27+29+31\text{-emer}} \times \text{TOC}_{\text{emer}}) / ((\text{F}_{\text{sub-sample}} / n\text{-C}_{23+25+27+29+31\text{-sub}} \times \text{TOC}_{\text{sub}}) + (\text{F}_{\text{emer-sample}} / n\text{-C}_{23+25+27+29+31\text{-emer}} \times \text{TOC}_{\text{emer}}) + (\text{F}_{\text{riv-sample}} / n\text{-C}_{23+25+27+29+31\text{-riv}} \times \text{TOC}_{\text{riv}})) \quad (19)$$

$$\text{TOC}_{\text{riv-sample}} = \text{TOC}_{\text{sample}} \times (\text{F}_{\text{riv-sample}} / n\text{-C}_{23+25+27+29+31\text{-riv}} \times \text{TOC}_{\text{riv}}) / ((\text{F}_{\text{sub-sample}} / n\text{-C}_{23+25+27+29+31\text{-sub}} \times \text{TOC}_{\text{sub}}) + (\text{F}_{\text{emer-sample}} / n\text{-C}_{23+25+27+29+31\text{-emer}} \times \text{TOC}_{\text{emer}}) + (\text{F}_{\text{riv-sample}} / n\text{-C}_{23+25+27+29+31\text{-riv}} \times \text{TOC}_{\text{riv}})) \quad (20)$$

Where  $n\text{-C}_{23+25+27+29+31\text{-sub}}$ ,  $n\text{-C}_{23+25+27+29+31\text{-emer}}$ ,  $n\text{-C}_{23+25+27+29+31\text{-riv}}$  are the concentrations of  $n\text{-C}_{23+25+27+29+31}$  alkanes in three sources.  $\text{TOC}_{\text{sub}}$ ,  $\text{TOC}_{\text{emer}}$ , and  $\text{TOC}_{\text{riv}}$  are the TOC values of  $n\text{-C}_{23+25+27+29+31}$  alkanes in three sources.

### References:

Ficken, K.J., Li, B., Swain, D. L., and Eglinton, G.: An  $n$ -alkane proxy for the sedimentary input of submerged/floating freshwater aquatic macrophytes. *Org. Geochem.*, 31, 745–749, [https://doi.org/10.1016/S0146-6380\(00\)00081-4](https://doi.org/10.1016/S0146-6380(00)00081-4), 2000.

Eglinton, G., and Hamilton, R. J.: Leaf epicuticular waxes. *Science*, 156, 1322-1335, doi: 10.1126/science.156.3780.1322, 1967.

## 2. Supplementary Figure:

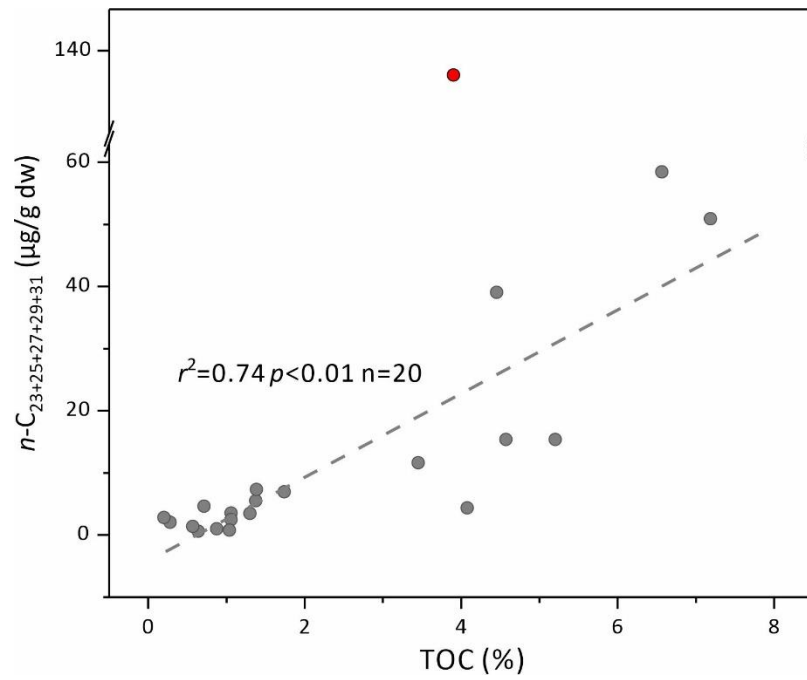

**Figure S1 Plot of TOC vs. concentrations of odd-chain  $n\text{-C}_{23}$  to  $n\text{-C}_{31}$  measured for sedimentary OC in lake sediments and lakeshore sediments in Lake Wuliangsu. Correlation line was shown for sediments excluding sample S3 due to extremely high  $n$ -alkane concentrations.**

## 2. Supplementary tables

**Table S1. TOC values and n-alkanes concentration and indices of sediments and plants**

| Sample | TOC (%) | <i>n</i> -C <sub>23</sub><br>(µg/g) | <i>n</i> -C <sub>24</sub><br>(µg/g) | <i>n</i> -C <sub>25</sub><br>(µg/g) | <i>n</i> -C <sub>26</sub><br>(µg/g) | <i>n</i> -C <sub>27</sub><br>(µg/g) | <i>n</i> -C <sub>28</sub><br>(µg/g) | <i>n</i> -C <sub>29</sub><br>(µg/g) | <i>n</i> -C <sub>30</sub><br>(µg/g) | <i>n</i> -C <sub>31</sub><br>(µg/g) | <i>n</i> -C <sub>32</sub><br>(µg/g) | <i>n</i> -C <sub>33</sub><br>(µg/g) | <i>n</i> -C <sub>23+25+27+29+31</sub><br>(µg/g) | <i>P</i> <sub>aq</sub> |
|--------|---------|-------------------------------------|-------------------------------------|-------------------------------------|-------------------------------------|-------------------------------------|-------------------------------------|-------------------------------------|-------------------------------------|-------------------------------------|-------------------------------------|-------------------------------------|-------------------------------------------------|------------------------|
| S1     | 0.64    | 0.04                                | 0.03                                | 0.07                                | 0.03                                | 0.13                                | 0.03                                | 0.26                                | 0.01                                | 0.12                                | 0.01                                | 0.00                                | 0.62                                            | 0.24                   |
| S2     | 0.88    | 0.11                                | 0.09                                | 0.17                                | 0.04                                | 0.19                                | 0.04                                | 0.42                                | 0.01                                | 0.15                                | 0.01                                | 0.04                                | 1.03                                            | 0.34                   |
| S3     | 3.90    | 14.04                               | 1.44                                | 42.59                               | 1.72                                | 25.67                               | 2.50                                | 35.66                               | 0.62                                | 19.09                               | 0.05                                | 6.52                                | 137.05                                          | 0.51                   |
| S4     | 0.71    | 0.40                                | 0.18                                | 0.67                                | 0.16                                | 0.97                                | 0.25                                | 1.81                                | 0.01                                | 0.80                                | 0.01                                | 0.01                                | 4.64                                            | 0.29                   |
| S5     | 1.37    | 0.49                                | 0.21                                | 0.84                                | 0.20                                | 1.20                                | 0.29                                | 2.09                                | 0.04                                | 0.90                                | 0.01                                | 0.26                                | 5.52                                            | 0.31                   |
| S6     | 4.08    | 0.30                                | 0.09                                | 0.48                                | 0.12                                | 0.74                                | 0.24                                | 1.79                                | 0.05                                | 1.07                                | 0.03                                | 0.02                                | 4.38                                            | 0.21                   |
| S7     | 5.20    | 1.24                                | 0.41                                | 2.04                                | 0.45                                | 2.60                                | 0.84                                | 6.46                                | 0.14                                | 3.05                                | 0.02                                | 2.53                                | 15.39                                           | 0.26                   |
| S8     | 4.57    | 1.47                                | 0.48                                | 2.76                                | 0.48                                | 2.93                                | 0.78                                | 5.25                                | 0.19                                | 2.96                                | 0.03                                | 0.04                                | 15.37                                           | 0.34                   |
| S9     | 3.45    | 1.01                                | 0.32                                | 1.83                                | 0.36                                | 2.44                                | 0.63                                | 4.56                                | 0.21                                | 1.79                                | 0.09                                | 1.71                                | 11.63                                           | 0.31                   |
| S10    | 1.74    | 0.72                                | 0.29                                | 1.21                                | 0.24                                | 1.53                                | 0.35                                | 2.49                                | 0.05                                | 1.02                                | 0.00                                | 0.45                                | 6.96                                            | 0.36                   |
| S11    | 6.57    | 6.82                                | 0.76                                | 15.07                               | 1.13                                | 12.50                               | 1.68                                | 17.60                               | 0.76                                | 6.48                                | 0.04                                | 10.34                               | 58.48                                           | 0.48                   |
| S12    | 7.19    | 4.82                                | 0.74                                | 12.34                               | 0.98                                | 11.84                               | 1.43                                | 16.22                               | 0.56                                | 5.70                                | 0.06                                | 8.15                                | 50.91                                           | 0.44                   |
| S13    | 4.45    | 4.94                                | 0.55                                | 10.50                               | 0.72                                | 8.61                                | 0.97                                | 10.63                               | 0.53                                | 4.40                                | 0.05                                | 4.57                                | 39.08                                           | 0.51                   |
| S14    | 1.38    | 0.84                                | 0.21                                | 1.72                                | 0.18                                | 1.56                                | 0.23                                | 2.20                                | 0.05                                | 1.06                                | 0.00                                | 0.58                                | 7.37                                            | 0.44                   |
| SS1    | 0.28    | 0.21                                | 0.19                                | 0.07                                | 0.12                                | 0.42                                | 0.10                                | 0.64                                | 0.04                                | 0.47                                | 0.03                                | 0.09                                | 1.82                                            | 0.32                   |
| SS2    | 1.30    | 0.26                                | 0.17                                | 0.17                                | 0.16                                | 0.81                                | 0.16                                | 1.13                                | 0.04                                | 0.74                                | 0.03                                | 0.09                                | 3.12                                            | 0.30                   |
| SS3    | 0.57    | 0.21                                | 0.14                                | 0.25                                | 0.08                                | 0.30                                | 0.06                                | 0.38                                | 0.04                                | 0.24                                | 0.01                                | 0.02                                | 1.38                                            | 0.43                   |
| SS4    | 1.06    | 0.62                                | 0.74                                | 0.85                                | 0.16                                | 0.67                                | 0.11                                | 0.80                                | 0.02                                | 0.59                                | 0.02                                | 0.13                                | 3.54                                            | 0.51                   |
| SS5    | 1.04    | 0.10                                | 0.02                                | 0.13                                | 0.03                                | 0.17                                | 0.03                                | 0.22                                | 0.01                                | 0.17                                | 0.00                                | 0.03                                | 0.79                                            | 0.37                   |
| SS6    | 0.15    | 0.19                                | 0.07                                | 0.37                                | 0.09                                | 0.50                                | 0.11                                | 0.95                                | 0.07                                | 0.73                                | 0.02                                | 0.05                                | 2.74                                            | 0.25                   |
| SS7    | 1.06    | 0.41                                | 0.16                                | 0.48                                | 0.10                                | 0.61                                | 0.09                                | 0.58                                | 0.02                                | 0.41                                | 0.00                                | 0.06                                | 2.50                                            | 0.47                   |

**Table S1. TOC values and n-alkanes concentration and indices of sediments**

| Sample | CPI   | %( <i>n</i> -C <sub>23</sub> + <i>n</i> -C <sub>25</sub> ) | %( <i>n</i> -C <sub>27</sub> + <i>n</i> -C <sub>29</sub> ) | % <i>n</i> -C <sub>31</sub> | δ <sup>13</sup> <i>n</i> -C <sub>23</sub> (‰) | δ <sup>13</sup> <i>n</i> -C <sub>25</sub> (‰) | δ <sup>13</sup> <i>n</i> -C <sub>27</sub> (‰) | δ <sup>13</sup> <i>n</i> -C <sub>29</sub> (‰) | δ <sup>13</sup> <i>n</i> -C <sub>31</sub> (‰) |
|--------|-------|------------------------------------------------------------|------------------------------------------------------------|-----------------------------|-----------------------------------------------|-----------------------------------------------|-----------------------------------------------|-----------------------------------------------|-----------------------------------------------|
| S1     | 5.79  | 19.1                                                       | 62.2                                                       | 18.7                        | -30.6                                         | -30.9                                         | -32.1                                         | -32.5                                         | -32.1                                         |
| S2     | 4.99  | 27.5                                                       | 58.3                                                       | 14.1                        | -31.2                                         | -31.2                                         | -32.1                                         | -32.6                                         | -32.4                                         |
| S3     | 19.18 | 41.3                                                       | 44.7                                                       | 13.9                        | -25.0                                         | -24.0                                         | -25.9                                         | -25.8                                         | -27.4                                         |
| S4     | 6.69  | 23.0                                                       | 60.1                                                       | 16.9                        | -32.4                                         | -31.0                                         | -32.6                                         | -32.7                                         | -32.7                                         |
| S5     | 6.48  | 24.1                                                       | 59.7                                                       | 16.3                        | -30.5                                         | -29.7                                         | -31.8                                         | -32.4                                         | -32.8                                         |
| S6     | 7.32  | 17.8                                                       | 57.9                                                       | 24.4                        | -31.5                                         | -30.5                                         | -33.5                                         | -33.8                                         | -34.8                                         |
| S7     | 7.22  | 21.3                                                       | 58.9                                                       | 19.8                        | -30.6                                         | -29.0                                         | -32.4                                         | -32.9                                         | -34.1                                         |
| S8     | 6.82  | 27.5                                                       | 53.1                                                       | 19.4                        | -28.5                                         | -27.3                                         | -29.7                                         | -30.9                                         | -33.6                                         |
| S9     | 6.75  | 24.5                                                       | 60.2                                                       | 15.4                        | -30.2                                         | -29.5                                         | -31.4                                         | -32.1                                         | -32.8                                         |
| S10    | 6.61  | 27.7                                                       | 57.7                                                       | 14.6                        | -31.4                                         | -30.8                                         | -32.0                                         | -32.0                                         | -32.4                                         |
| S11    | 11.98 | 37.4                                                       | 51.5                                                       | 11.1                        | -28.5                                         | -26.6                                         | -28.2                                         | -28.9                                         | -31.0                                         |
| S12    | 12.28 | 33.7                                                       | 55.1                                                       | 11.2                        | -28.1                                         | -26.3                                         | -27.9                                         | -29.2                                         | -30.4                                         |
| S13    | 12.40 | 39.5                                                       | 49.2                                                       | 11.3                        | -28.4                                         | -25.5                                         | -27.5                                         | -28.1                                         | -29.2                                         |
| S14    | 9.67  | 34.6                                                       | 51.0                                                       | 14.3                        | -26.9                                         | -25.4                                         | -26.9                                         | -27.9                                         | -29.5                                         |
| SS1    | 3.84  | 25.9                                                       | 51.2                                                       | 22.9                        | -31.9                                         | -31.5                                         | -32.5                                         | -33.4                                         | -34.2                                         |
| SS2    | 5.55  | 22.9                                                       | 55.8                                                       | 21.3                        | -30.1                                         | -31.3                                         | -33.6                                         | -33.7                                         | -33.0                                         |
| SS3    | 3.62  | 33.8                                                       | 49.1                                                       | 17.1                        | -30.1                                         | -31.2                                         | -33.5                                         | -34.8                                         | -36.5                                         |
| SS4    | 2.83  | 41.6                                                       | 41.7                                                       | 16.7                        | -34.4                                         | -34.3                                         | -33.4                                         | -33.3                                         | -34.2                                         |
| SS5    | 7.26  | 29.1                                                       | 49.0                                                       | 21.9                        | -26.0                                         | -26.8                                         | -30.4                                         | -31.4                                         | -32.1                                         |
| SS6    | 6.78  | 20.5                                                       | 52.9                                                       | 26.6                        | -27.2                                         | -28.3                                         | -27.5                                         | -30.2                                         | -33.4                                         |
| SS7    | 5.55  | 35.7                                                       | 47.8                                                       | 16.5                        | -28.5                                         | -28.2                                         | -29.8                                         | -30.5                                         | -30.3                                         |

**Table S1. TOC values and n-alkanes concentration and indices of sediments and plants**

| Sample                | TOC (%) | <i>n</i> -C <sub>23</sub> (µg/g) | <i>n</i> -C <sub>24</sub> (µg/g) | <i>n</i> -C <sub>25</sub> (µg/g) | <i>n</i> -C <sub>26</sub> (µg/g) | <i>n</i> -C <sub>27</sub> (µg/g) | <i>n</i> -C <sub>28</sub> (µg/g) | <i>n</i> -C <sub>29</sub> (µg/g) | <i>n</i> -C <sub>30</sub> (µg/g) | <i>n</i> -C <sub>31</sub> (µg/g) | <i>n</i> -C <sub>32</sub> (µg/g) | <i>n</i> -C <sub>33</sub> (µg/g) | <i>n</i> -C <sub>23+25+27+29+31</sub> (µg/g) | <i>P</i> <sub>aq</sub> |
|-----------------------|---------|----------------------------------|----------------------------------|----------------------------------|----------------------------------|----------------------------------|----------------------------------|----------------------------------|----------------------------------|----------------------------------|----------------------------------|----------------------------------|----------------------------------------------|------------------------|
| Riverine soil         | 0.20    | 0.17                             | 0.16                             | 0.29                             | 0.11                             | 0.65                             | 0.13                             | 0.92                             | 0.04                             | 0.82                             | 0.10                             | 0.25                             | 2.84                                         | 0.21                   |
| Submerged macrophytes | 33.73   | 31.48                            | 2.87                             | 56.59                            | 1.86                             | 24.27                            | 1.04                             | 15.40                            | 0.55                             | 5.01                             | n.a.                             | n.d.                             | 132.75                                       | 0.82                   |
| Emergent Plants       | 37.08   | 6.24                             | 2.05                             | 14.18                            | 2.70                             | 21.66                            | 1.52                             | 25.20                            | n.d.                             | n.d.                             | n.d.                             | n.d.                             | 67.29                                        | 0.45                   |

| Sample                | CPI   | %( <i>n</i> -C <sub>23</sub> + <i>n</i> -C <sub>25</sub> ) | %( <i>n</i> -C <sub>27</sub> + <i>n</i> -C <sub>29</sub> ) | % <i>n</i> -C <sub>31</sub> | δ <sup>13</sup> <i>n</i> -C <sub>23</sub> (‰) | δ <sup>13</sup> <i>n</i> -C <sub>25</sub> (‰) | δ <sup>13</sup> <i>n</i> -C <sub>27</sub> (‰) | δ <sup>13</sup> <i>n</i> -C <sub>29</sub> (‰) | δ <sup>13</sup> <i>n</i> -C <sub>31</sub> (‰) |
|-----------------------|-------|------------------------------------------------------------|------------------------------------------------------------|-----------------------------|-----------------------------------------------|-----------------------------------------------|-----------------------------------------------|-----------------------------------------------|-----------------------------------------------|
| Riverine soil         | 6.03  | 15.9                                                       | 55.3                                                       | 28.8                        | -30.7                                         | -31.1                                         | -31.6                                         | -32.1                                         | -33.1                                         |
| Submerged macrophytes | 18.02 | 67.6                                                       | 28.9                                                       | 3.5                         | -25.0                                         | -24.6                                         | -24.6                                         | -26.1                                         | -26.5                                         |
| Emergent Plants       | 10.24 | 30.4                                                       | 69.6                                                       | 0.0                         | -34.1                                         | -35.4                                         | -35.8                                         | -36.6                                         | n.d.                                          |

**Table S2. The results of end-member mixing Model #1 based on n-alkanes indices**

| Sample | TOC(%) | %Riverine-alkane | %Sub-alkane | %Emer-alkane | CPIest | $\delta^{13}n\text{-C}_{23}\text{-est}$ (‰) | $\delta^{13}n\text{-C}_{25}\text{-est}$ (‰) | $\delta^{13}n\text{-C}_{27}\text{-est}$ (‰) | $\delta^{13}n\text{-C}_{29}\text{-est}$ (‰) | $\delta^{13}n\text{-C}_{31}\text{-est}$ (‰) |
|--------|--------|------------------|-------------|--------------|--------|---------------------------------------------|---------------------------------------------|---------------------------------------------|---------------------------------------------|---------------------------------------------|
| S1     | 0.64   | 65.6             | 0.0         | 34.4         | 7.14   | -32.2                                       | -34.2                                       | -33.3                                       | -33.7                                       | -33.1                                       |
| S2     | 0.88   | 47.7             | 10.6        | 41.7         | 8.10   | -30.6                                       | -31.6                                       | -33.2                                       | -34.0                                       | -32.9                                       |
| S3     | 3.90   | 42.8             | 42.9        | 14.3         | 9.32   | -26.9                                       | -26.5                                       | -30.0                                       | -31.9                                       | -32.3                                       |
| S4     | 0.71   | 59.3             | 3.7         | 37.0         | 7.46   | -31.5                                       | -33.1                                       | -33.3                                       | -33.8                                       | -33.0                                       |
| S5     | 1.37   | 56.0             | 5.1         | 38.9         | 7.62   | -31.3                                       | -32.8                                       | -33.3                                       | -33.9                                       | -33.0                                       |
| S6     | 4.08   | 84.7             | 0.0         | 15.3         | 6.49   | -31.4                                       | -32.3                                       | -32.4                                       | -32.9                                       | -33.1                                       |
| S7     | 5.20   | 68.6             | 2.7         | 28.7         | 7.09   | -31.4                                       | -32.9                                       | -32.9                                       | -33.4                                       | -33.0                                       |
| S8     | 4.57   | 64.6             | 16.7        | 18.7         | 7.53   | -29.0                                       | -29.0                                       | -31.7                                       | -32.7                                       | -32.8                                       |
| S9     | 3.45   | 52.7             | 4.7         | 42.6         | 7.74   | -31.5                                       | -33.1                                       | -33.5                                       | -34.1                                       | -33.0                                       |
| S10    | 1.74   | 49.0             | 11.6        | 39.4         | 8.07   | -30.3                                       | -31.3                                       | -33.0                                       | -33.8                                       | -32.9                                       |
| S11    | 6.57   | 34.6             | 30.2        | 35.2         | 9.34   | -28.3                                       | -28.7                                       | -31.9                                       | -33.4                                       | -32.4                                       |
| S12    | 7.19   | 36.1             | 21.6        | 42.3         | 8.97   | -29.3                                       | -30.0                                       | -32.7                                       | -33.9                                       | -32.6                                       |
| S13    | 4.45   | 34.5             | 35.3        | 30.2         | 9.53   | -27.8                                       | -28.0                                       | -31.4                                       | -33.0                                       | -32.3                                       |
| S14    | 1.38   | 46.5             | 27.4        | 26.1         | 8.62   | -28.3                                       | -28.4                                       | -31.6                                       | -32.9                                       | -32.6                                       |
| SS1    | 0.28   | 77.4             | 17.4        | 5.2          | 7.05   | -28.4                                       | -27.4                                       | -30.9                                       | -32.0                                       | -32.9                                       |
| SS2    | 1.30   | 73.0             | 8.4         | 18.6         | 7.04   | -30.0                                       | -30.5                                       | -32.2                                       | -32.9                                       | -33.0                                       |
| SS3    | 0.57   | 55.5             | 29.0        | 15.5         | 8.22   | -27.8                                       | -27.4                                       | -30.9                                       | -32.3                                       | -32.7                                       |
| SS4    | 1.06   | 51.8             | 46.9        | 0.0          | 8.91   | -26.3                                       | -25.2                                       | -28.7                                       | -30.7                                       | -32.4                                       |
| SS5    | 1.04   | 73.1             | 23.8        | 3.1          | 7.34   | -27.7                                       | -26.5                                       | -30.4                                       | -31.7                                       | -32.8                                       |
| SS6    | 0.15   | 91.0             | 9.0         | 0.0          | 6.43   | -29.1                                       | -27.9                                       | -31.1                                       | -31.9                                       | -33.0                                       |
| SS7    | 1.06   | 53.1             | 32.7        | 14.2         | 8.44   | -27.5                                       | -27.0                                       | -30.6                                       | -32.1                                       | -32.6                                       |



**Table S3. The results of end-member mixing Model #2 and Model #3 based on *n*-alkanes indices**

| Sample   | TOC(%) | %Riverine- alkane | %Sub-alkane | %Emer-alkane | CPI <sub>est</sub> | %Riverine-OC | %Sub-OC | %Emer-OC | Riverine source TOC (%) | Sub-derived TOC (%) | Emer-derived TOC (%) |
|----------|--------|-------------------|-------------|--------------|--------------------|--------------|---------|----------|-------------------------|---------------------|----------------------|
| Model #2 |        |                   |             |              |                    |              |         |          |                         |                     |                      |
| S1       | 0.64   | 41.1              | 21.3        | 37.6         | 8.69               | 10.6         | 18.5    | 70.8     | 0.07                    | 0.12                | 0.45                 |
| S2       | 0.88   | 43.1              | 24.2        | 32.7         | 8.67               | 11.9         | 22.4    | 65.7     | 0.10                    | 0.20                | 0.58                 |
| S3       | 3.90   | 2.6               | 95.5        | 1.9          | 16.92              | 0.8          | 95.1    | 4.1      | 0.03                    | 3.71                | 0.16                 |
| S4       | 0.71   | 38.5              | 22.4        | 39.2         | 8.85               | 9.6          | 18.8    | 71.5     | 0.07                    | 0.13                | 0.51                 |
| S5       | 1.37   | 43.6              | 23.9        | 32.5         | 8.64               | 12.1         | 22.2    | 65.7     | 0.17                    | 0.31                | 0.90                 |
| S6       | 4.08   | 42.6              | 14.0        | 43.4         | 8.40               | 10.5         | 11.6    | 77.9     | 0.43                    | 0.47                | 3.17                 |
| S7       | 5.20   | 43.2              | 21.2        | 35.6         | 8.58               | 11.5         | 19.0    | 69.4     | 0.60                    | 0.99                | 3.61                 |
| S8       | 4.57   | 39.9              | 39.8        | 20.3         | 9.35               | 12.4         | 41.5    | 46.0     | 0.57                    | 1.90                | 2.11                 |
| S9       | 3.45   | 44.5              | 26.1        | 29.4         | 8.65               | 12.9         | 25.3    | 61.8     | 0.44                    | 0.87                | 2.13                 |
| S10      | 1.74   | 40.4              | 25.2        | 34.4         | 8.84               | 10.7         | 22.5    | 66.7     | 0.19                    | 0.39                | 1.16                 |
| S11      | 6.57   | 19.5              | 62.2        | 18.2         | 11.86              | 5.4          | 57.8    | 36.7     | 0.35                    | 3.80                | 2.41                 |
| S12      | 7.19   | 20.0              | 64.0        | 16.1         | 11.92              | 5.7          | 61.1    | 33.3     | 0.41                    | 4.39                | 2.39                 |
| S13      | 4.45   | 13.0              | 73.1        | 14.0         | 13.24              | 3.6          | 68.1    | 28.3     | 0.16                    | 3.04                | 1.26                 |
| S14      | 1.38   | 13.6              | 76.4        | 9.9          | 13.43              | 4.0          | 74.9    | 21.1     | 0.06                    | 1.04                | 0.29                 |
| SS1      | 0.28   | 47.9              | 13.0        | 39.1         | 8.13               | 12.1         | 11.7    | 76.3     | 0.03                    | 0.03                | 0.21                 |
| SS2      | 1.30   | 43.0              | 12.9        | 44.1         | 8.35               | 10.0         | 10.7    | 79.3     | 0.13                    | 0.14                | 1.03                 |
| SS3      | 0.57   | 34.5              | 14.9        | 50.6         | 8.82               | 7.2          | 11.1    | 81.7     | 0.04                    | 0.06                | 0.46                 |
| SS4      | 1.06   | 30.5              | 7.7         | 61.8         | 8.81               | 5.7          | 5.1     | 89.2     | 0.06                    | 0.05                | 0.95                 |
| SS5      | 1.04   | 39.7              | 43.9        | 16.4         | 9.51               | 12.3         | 48.5    | 39.3     | 0.13                    | 0.50                | 0.41                 |
| SS6      | 0.15   | 43.9              | 42.3        | 13.8         | 9.21               | 14.5         | 50.1    | 35.4     | 0.02                    | 0.07                | 0.05                 |
| SS7      | 1.06   | 30.9              | 48.5        | 20.6         | 10.26              | 8.5          | 47.6    | 43.9     | 0.09                    | 0.51                | 0.47                 |

**Table S3. The results of end-member mixing Model #2 and Model #3 based on *n*-alkanes indice**

| Sample   | TOC(%) | %Riverine- alkane | %Sub-alkane | %Emer-alkane | CPI <sub>est</sub> | %Riverine-OC | %Sub-OC | %Emer-OC | Riverine source TOC (%) | Sub-derived TOC (%) | Emer-derived TOC (%) |
|----------|--------|-------------------|-------------|--------------|--------------------|--------------|---------|----------|-------------------------|---------------------|----------------------|
| Model #3 |        |                   |             |              |                    |              |         |          |                         |                     |                      |
| S1       | 0.64   | n.a               | n.a         | n.a          | n.a                | n.a          | n.a     | n.a      | n.a                     | n.a                 | n.a                  |
| S2       | 0.88   | 42.6              | 20.3        | 37.2         | 8.58               | 11.2         | 17.9    | 71.0     | 0.10                    | 0.16                | 0.62                 |
| S3       | 3.90   | 3.5               | 95.3        | 1.2          | 16.72              | 1.1          | 96.3    | 2.6      | 0.04                    | 3.76                | 0.10                 |
| S4       | 0.71   | 53.1              | 13.7        | 33.1         | 7.92               | 15.6         | 13.5    | 70.9     | 0.11                    | 0.10                | 0.51                 |
| S5       | 1.37   | 46.1              | 21.9        | 32.0         | 8.46               | 13.1         | 20.9    | 66.1     | 0.18                    | 0.29                | 0.91                 |
| S6       | 4.08   | n.a               | n.a         | n.a          | n.a                | n.a          | n.a     | n.a      | n.a                     | n.a                 | n.a                  |
| S7       | 5.20   | 61.3              | 13.0        | 25.7         | 7.56               | 21.0         | 15.0    | 64.0     | 1.09                    | 0.78                | 3.33                 |
| S8       | 4.57   | 50.7              | 34.6        | 14.7         | 8.59               | 18.5         | 42.4    | 39.0     | 0.85                    | 1.94                | 1.79                 |
| S9       | 3.45   | 40.5              | 26.7        | 32.8         | 8.88               | 11.0         | 24.3    | 64.7     | 0.38                    | 0.84                | 2.23                 |
| S10      | 1.74   | 42.8              | 22.9        | 34.4         | 8.65               | 11.6         | 20.7    | 67.7     | 0.20                    | 0.36                | 1.18                 |
| S11      | 6.57   | 18.1              | 63.4        | 18.5         | 12.05              | 5.0          | 58.2    | 36.8     | 0.33                    | 3.82                | 2.42                 |
| S12      | 7.19   | 15.6              | 66.0        | 18.3         | 12.46              | 4.2          | 59.8    | 36.0     | 0.30                    | 4.30                | 2.59                 |
| S13      | 4.45   | 14.1              | 73.5        | 12.4         | 13.15              | 4.0          | 70.3    | 25.6     | 0.18                    | 3.13                | 1.14                 |
| S14      | 1.38   | 15.4              | 75.9        | 8.7          | 13.18              | 4.6          | 76.4    | 19.0     | 0.06                    | 1.06                | 0.26                 |
| SS1      | 0.28   | 73.5              | 21.6        | 4.9          | 7.27               | 38.9         | 40.9    | 20.3     | 0.11                    | 0.11                | 0.06                 |
| SS2      | 1.30   | 63.1              | 20.8        | 16.1         | 7.66               | 24.1         | 28.3    | 47.6     | 0.31                    | 0.37                | 0.62                 |
| SS3      | 0.57   | 60.4              | 22.7        | 16.9         | 7.82               | 22.2         | 29.8    | 48.0     | 0.13                    | 0.17                | 0.27                 |
| SS4      | 1.06   | n.a               | n.a         | n.a          | n.a                | n.a          | n.a     | n.a      | n.a                     | n.a                 | n.a                  |
| SS5      | 1.04   | 46.7              | 51.3        | 2.0          | 9.37               | 19.1         | 74.8    | 6.2      | 0.20                    | 0.78                | 0.06                 |
| SS6      | 0.15   | n.a               | n.a         | n.a          | n.a                | n.a          | n.a     | n.a      | n.a                     | n.a                 | n.a                  |
| SS7      | 1.06   | 34.4              | 56.4        | 9.2          | 10.38              | 11.2         | 65.7    | 23.2     | 0.12                    | 0.70                | 0.25                 |

**Table S4. GDGTs indices and results from Model #2 and Model #3 of lake sediments and lakeshore sediments**

| Sample   | Riverine source<br>TOC (%) | Sub-derived<br>TOC (%) | Emer-derived<br>TOC (%) | GDGT-0<br>(ug/g TOC) | in-situ brGDGTs<br>(ug/g TOC) | allocholl brGDGTs<br>(ug/g TOC) | BIT  | MBT  | CBT  | R <sub>0/5</sub> | BR <i>in-situ/soil</i> |
|----------|----------------------------|------------------------|-------------------------|----------------------|-------------------------------|---------------------------------|------|------|------|------------------|------------------------|
| Model #2 |                            |                        |                         |                      |                               |                                 |      |      |      |                  |                        |
| S1       | 0.07                       | 0.12                   | 0.45                    | 1.39                 | 8.34                          | 5.19                            | 0.92 | 0.22 | 0.25 | 1.65             | 1.61                   |
| S2       | 0.10                       | 0.20                   | 0.58                    | 1.72                 | 6.21                          | 0.97                            | 0.97 | 0.22 | 0.32 | 10.50            | 6.37                   |
| S3       | 0.03                       | 3.71                   | 0.16                    | 7.39                 | 34.02                         | 0.24                            | 1.00 | 0.31 | 0.41 | 175.75           | 141.76                 |
| S4       | 0.07                       | 0.13                   | 0.51                    | 7.76                 | 61.51                         | 4.34                            | 0.99 | 0.25 | 0.37 | 21.09            | 15.16                  |
| S5       | 0.17                       | 0.31                   | 0.90                    | 14.07                | 31.71                         | 1.54                            | 0.99 | 0.24 | 0.37 | 16.88            | 20.53                  |
| S6       | 0.43                       | 0.47                   | 3.17                    | 1.51                 | 6.21                          | 0.21                            | 0.99 | 0.28 | 0.39 | 40.63            | 28.92                  |
| S7       | 0.60                       | 0.99                   | 3.61                    | 3.12                 | 21.23                         | 0.37                            | 1.00 | 0.28 | 0.31 | 50.24            | 56.64                  |
| S8       | 0.57                       | 1.90                   | 2.11                    | 1.72                 | 11.93                         | 0.21                            | 1.00 | 0.28 | 0.39 | 47.31            | 56.80                  |
| S9       | 0.44                       | 0.87                   | 2.13                    | 1.55                 | 8.78                          | 0.30                            | 0.99 | 0.27 | 0.34 | 30.50            | 29.09                  |
| S10      | 0.19                       | 0.39                   | 1.16                    | 2.29                 | 17.06                         | 0.81                            | 0.99 | 0.26 | 0.37 | 16.37            | 21.06                  |
| S11      | 0.35                       | 3.80                   | 2.41                    | 5.26                 | 32.12                         | 0.33                            | 1.00 | 0.31 | 0.37 | 92.45            | 106.65                 |
| S12      | 0.41                       | 4.39                   | 2.39                    | 0.06                 | 1.15                          | 0.00                            | 1.00 | 0.30 | 0.37 | n.a              | n.a                    |
| S13      | 0.16                       | 3.04                   | 1.26                    | 0.63                 | 7.04                          | 0.09                            | 1.00 | 0.32 | 0.37 | 39.76            | 76.69                  |
| S14      | 0.06                       | 1.04                   | 0.29                    | 0.55                 | 5.34                          | 0.38                            | 0.98 | 0.29 | 0.33 | 8.71             | 14.17                  |
| SS1      | 0.02                       | 0.03                   | 0.23                    | 0.06                 | 4.79                          | 1.20                            | 0.93 | 0.24 | 0.38 | 6.94             | 2.25                   |
| SS2      | 0.04                       | 0.39                   | 0.88                    | 0.84                 | 0.10                          | 0.05                            | 0.96 | 0.36 | 0.29 | 4.54             | 3.99                   |
| SS3      | 0.04                       | 0.06                   | 0.46                    | 1.70                 | 5.59                          | 1.25                            | 0.96 | 0.26 | 0.37 | 8.05             | 4.48                   |
| SS4      | 0.12                       | 0.07                   | 0.87                    | 0.08                 | 0.65                          | 0.12                            | 0.96 | 0.27 | 0.24 | 4.03             | 5.25                   |
| SS5      | 0.01                       | 0.29                   | 0.75                    | n.a                  | n.a                           | n.a                             | n.a  | n.a  | n.a  | n.a              | n.a                    |
| SS6      | 0.02                       | 0.07                   | 0.05                    | 1.16                 | 2.23                          | 4.38                            | 0.87 | 0.36 | 0.18 | 1.89             | 0.51                   |
| SS7      | 0.05                       | 0.58                   | 0.43                    | 0.02                 | 0.02                          | 0.06                            | 0.85 | 0.38 | 0.19 | 1.46             | 0.34                   |

**Table S4. GDGTs indices and results from Model #2 and Model #3 of lake sediments and lakeshore**

| Sample   | Riverine source<br>TOC (%) | Sub-derived<br>TOC (%) | Emer-derived<br>TOC (%) | GDGT-0<br>(ug/g TOC) | in-situ brGDGTs<br>(ug/g TOC) | allocholl brGDGTs<br>(ug/g TOC) | BIT  | MBT  | CBT  | R <sub>0/5</sub> | BR <i>in-situ/soil</i> |
|----------|----------------------------|------------------------|-------------------------|----------------------|-------------------------------|---------------------------------|------|------|------|------------------|------------------------|
| Model #3 |                            |                        |                         |                      |                               |                                 |      |      |      |                  |                        |
| S2       | 0.10                       | 0.16                   | 0.62                    | 1.72                 | 6.21                          | 0.97                            | 0.97 | 0.22 | 0.32 | 10.50            | 6.37                   |
| S3       | 0.04                       | 3.76                   | 0.10                    | 7.39                 | 34.02                         | 0.24                            | 1.00 | 0.31 | 0.41 | 175.75           | 141.76                 |
| S4       | 0.11                       | 0.10                   | 0.51                    | 7.76                 | 61.51                         | 4.34                            | 0.99 | 0.25 | 0.37 | 21.09            | 15.16                  |
| S5       | 0.18                       | 0.29                   | 0.91                    | 14.07                | 31.71                         | 1.54                            | 0.99 | 0.24 | 0.37 | 16.88            | 20.53                  |
| S6       | n.a                        | n.a                    | n.a                     | 1.51                 | 6.21                          | 0.21                            | 0.99 | 0.28 | 0.39 | 40.63            | 28.92                  |
| S7       | 1.09                       | 0.78                   | 3.33                    | 3.12                 | 21.23                         | 0.37                            | 1.00 | 0.28 | 0.31 | 50.24            | 56.64                  |
| S8       | 0.85                       | 1.94                   | 1.79                    | 1.72                 | 11.93                         | 0.21                            | 1.00 | 0.28 | 0.39 | 47.31            | 56.80                  |
| S9       | 0.38                       | 0.84                   | 2.23                    | 1.55                 | 8.78                          | 0.30                            | 0.99 | 0.27 | 0.34 | 30.50            | 29.09                  |
| S10      | 0.20                       | 0.36                   | 1.18                    | 2.29                 | 17.06                         | 0.81                            | 0.99 | 0.26 | 0.37 | 16.37            | 21.06                  |
| S11      | 0.33                       | 3.82                   | 2.42                    | 5.26                 | 32.12                         | 0.33                            | 1.00 | 0.31 | 0.37 | 92.45            | 106.65                 |
| S12      | 0.30                       | 4.30                   | 2.59                    | 0.06                 | 1.15                          | 0.00                            | 1.00 | 0.30 | 0.37 | n.a              | n.a                    |
| S13      | 0.18                       | 3.13                   | 1.14                    | 0.63                 | 7.04                          | 0.09                            | 1.00 | 0.32 | 0.37 | 39.76            | 76.69                  |
| S14      | 0.06                       | 1.06                   | 0.26                    | 0.55                 | 5.34                          | 0.38                            | 0.98 | 0.29 | 0.33 | 8.71             | 14.17                  |
| SS1      | 0.11                       | 0.11                   | 0.06                    | 0.06                 | 4.79                          | 1.20                            | 0.93 | 0.24 | 0.38 | 6.94             | 2.25                   |
| SS2      | 0.31                       | 0.37                   | 0.62                    | 0.84                 | 0.10                          | 0.05                            | 0.96 | 0.36 | 0.29 | 4.54             | 3.99                   |
| SS3      | 0.13                       | 0.17                   | 0.27                    | 1.70                 | 5.59                          | 1.25                            | 0.96 | 0.26 | 0.37 | 8.05             | 4.48                   |
| SS4      | n.a                        | n.a                    | n.a                     | 0.08                 | 0.65                          | 0.12                            | 0.96 | 0.27 | 0.24 | 4.03             | 5.25                   |
| SS5      | 0.20                       | 0.78                   | 0.06                    | n.a                  | n.a                           | n.a                             | n.a  | n.a  | n.a  | n.a              | n.a                    |
| SS6      | n.a                        | n.a                    | n.a                     | 1.16                 | 2.23                          | 4.38                            | 0.87 | 0.36 | 0.18 | 1.89             | 0.51                   |
| SS7      | 0.12                       | 0.70                   | 0.25                    | 0.02                 | 0.02                          | 0.06                            | 0.85 | 0.38 | 0.19 | 1.46             | 0.34                   |

Note:  $\%(n-C_{23}+n-C_{25})=(n-C_{23}+n-C_{25})/(n-C_{23}+n-C_{25}+n-C_{27}+n-C_{29}+n-C_{31})$

$\%(n-C_{27}+n-C_{29})=(n-C_{27}+n-C_{29})/(n-C_{23}+n-C_{25}+n-C_{27}+n-C_{29}+n-C_{31})$

$\%n-C_{31}=(n-C_{31})/(n-C_{23}+n-C_{25}+n-C_{27}+n-C_{29}+n-C_{31})$

$P_{aq}=(n-C_{23}+n-C_{25})/(n-C_{23}+n-C_{25}+n-C_{29}+n-C_{31})$

$CPI=(n-C_{23}+n-C_{25}+n-C_{27}+n-C_{29})+(n-C_{25}+n-C_{27}+n-C_{29}+n-C_{31})/(2*((n-C_{24}+n-C_{26}+n-C_{28}+n-C_{30}))$

%Riverine-alkane: relative n-alkane contribution derived from riverine soil

%Sub-alkane: relative n-alkane contribution derived from submerged macrophytes

%Emer-alkane: relative n-alkane contribution derived from emergent plants

%Riverine-OC: relative OC contribution derived from riverine soil

%Sub-OC: relative OC contribution derived from submerged macrophytes

%Emer-OC: relative OC contribution derived from emergent plants

CPI<sub>est</sub>: CPI values calculated based on the results of mixing models

n.d.: not detected

n.a.: not available
